# **Title:** Intrinsic ecological dynamics drive biodiversity turnover in model metacommunities

**Authors:** Jacob D. O’Sullivan<sup>1</sup>, J. Christopher D. Terry<sup>1</sup>, Axel G. Rossberg<sup>1</sup>

5th May 2020

**Short title:** Autonomous turnover in metacommunities

**One Sentence Summary:** Biodiversity change previously attributed to external drivers is explained as a robust, naturally occurring phenomenon.

---

**Affiliations:** <sup>1</sup>School of Biological and Chemical Sciences, Queen Mary University of London, Mile End Road, London, E1 4NS, United Kingdom

**Corresponding author:** Jacob Dinner O’Sullivan (j.osullivan@qmul.ac.uk), School of Biological and Chemical Sciences, Queen Mary University of London, Mile End Road, London E1 4NS, United Kingdom

**Document statistics:** Summary - 185 words, Main Text - 2703 words, 4 figures; Methods - 450 words; Supporting Information 2212 words, 10 figures; Citations - 67.

**Keywords:** biodiversity — macroecology — spatial ecology — metacommunity — community turnover — ecological structural stability

1 **Abstract:**

2 **Turnover of species composition through time is frequently observed in nature.**  
3 **Often explained by changes in abiotic conditions or regional species pools,**  
4 **compositional turnover is employed as an indicator of external stress in nat-**  
5 **ural ecosystems. Theoretically, the possibility of turnover driven by intrinsic**  
6 **ecological dynamics—species interactions, dispersal—is also known, but what**  
7 **role such *autonomous* turnover plays in nature remains unclear. Expanding**  
8 **the boundaries of metacommunity modelling, we show that in large meta-**  
9 **communities immigration pressure from neighbouring locales robustly drives**  
10 **continuous turnover in local composition—without environmental change or**  
11 **regional invasions. That ecological communities may turn over autonomously**  
12 **challenges assumptions implicit in assessment and management tools, and sug-**  
13 **gests that natural compositional change should be incorporated in ecological**  
14 **status assessments based on ancestral baselines.**

15 **Main Text:**

16 Change in species composition through time, called community turnover, is observed in most  
17 ecosystems (1–3). Potential drivers include changes in the abiotic environment (4–6), random  
18 population fluctuations due to demographic stochasticity (7), and autonomous population dy-  
19 namics driven by species interactions and dispersal (8, 9). While there exist well-developed  
20 bodies of theory describing community turnover due to environmental change (10, 11) and  
21 demographic stochasticity (12), our understanding of autonomous compositional change is un-  
22 derdeveloped. In particular, it remains unclear to what extent observed spatio-temporal patterns  
23 in biodiversity may be due to autonomous ecological dynamics.

24 If it were known that intrinsic ecological dynamics alone cannot account for observed com-

25 positional turnover, then abiotic environmental change would be the most plausible explanation  
26 (turnover by demographic stochasticity alone is predicted to be orders of magnitude slower than  
27 observed (*1*)). In the current phase of rapid anthropogenic environmental change, any altera-  
28 tion in the composition of an ecological community should then be interpreted as a potential  
29 indicator of stress (*13–15*) and the degree of compositional change compared to past baselines  
30 a valid measure of anthropogenic impact.

31 If, on the other hand, temporal community turnover is a natural phenomenon that can arise  
32 independently of changes in the abiotic environment, then observed shifts in the composition  
33 of ecological communities would *not* necessarily imply the presence of external pressures.  
34 Intrinsic dynamics may even permit ecosystems to adapt and absorb environmental change  
35 without impacting ecosystem functioning. Assessments, projections and mitigation strategies  
36 would then need to account for such autonomous compositional turnover.

37 So, can communities of many interacting species turn over autonomously? If so, what is  
38 the driving mechanism? And does the resulting turnover reproduce patterns observed in empir-  
39 ical data? Here we address these questions drawing on recent advances (*16*) in the theory of  
40 metacommunities (*17*), using population-dynamical simulation models with explicitly defined  
41 spatial and environmental structure. To ensure turnover is purely autonomous, we keep the en-  
42 vironment fixed throughout simulations. In our model, local community composition is determ-  
43 ined by *species sorting* (non-uniform responses of species to local environmental conditions  
44 and interspecific competition) and *mass effects* (immigration from neighbouring locales). The  
45 model can be understood as a simplified representation of interactions within guilds (e.g. trees  
46 or intertidal invertebrates) and has been shown to reproduce fundamental spatial biodiversity  
47 patterns (*16*).

48 Each of our simulated metacommunities occupies a two-dimensional landscape defined by  
49 a random spatial network, mapped onto an abiotic environment. The metacommunity is as-

50 assembled in a stepwise fashion by the iterative introduction of species whose numerical eco-  
51 logical traits are randomly sampled. There is an intrinsic limit on the number of species that  
52 can coexist in such a metacommunity (16). In all cases, we assemble until regional diversity  
53 reaches this asymptote; thereafter autonomous steady state dynamics are studied in the absence  
54 of regional invasions. Abiotic filtering occurs via the spatial variation of intrinsic growth rates  
55  $R_{ix}$  and biotic filtering via interspecific competition encoded in the interaction coefficients  $A_{ij}$ .  
56 A spatial connectivity matrix with elements  $D_{xy}$  describes dispersal. Here  $i, j$  are species in-  
57 dices while  $x, y$  refer to patches. We model metacommunity dynamics of population biomasses  
58  $B_{ix} = B_{ix}(t)$  using a system of spatially coupled Lotka-Volterra (LV) equations that, in matrix  
59 notation, has the form (16)

$$\frac{d\mathbf{B}}{dt} = \mathbf{B} \circ (\mathbf{R} - \mathbf{A}\mathbf{B}) + \mathbf{B}\mathbf{D}, \quad (1)$$

60 with  $\circ$  denoting element-wise multiplication.

61 Intrinsic growth rates  $R_{ix}$  are sampled from spatially correlated normal distributions with  
62 autocorrelation length  $\phi$  and variance  $\sigma^2$  (Fig. S1). For simplicity, and since predator-prey dy-  
63 namics are known to generate fluctuations through mechanisms distinct from those we report  
64 here, we restrict our analysis to competitive communities for which all ecological interactions  
65 are antagonistic. The off-diagonal elements of the interaction matrix  $\mathbf{A}$  are sampled independ-  
66 ently from a distribution in the range  $0 \leq A_{ij} < 1$  ( $i \neq j$ ) and we set all  $A_{ii} = 1$ . The topology  
67 of our model metacommunities, expressed through  $\mathbf{D}$ , is generated by sampling the spatial co-  
68 ordinates of the  $N$  local communities uniformly from a  $\sqrt{N} \times \sqrt{N}$  square, and linking them  
69 through a Gabriel graph (18). Immigration rates  $D_{xy} > 0$  are then modelled using an exponen-  
70 tial dispersal kernel with characteristic length  $\ell$  (19). We selected a combination of parameters  
71  $\phi$ ,  $\sigma^2$  and  $\ell$  that generates substantial autonomous turnover (Fig. S2) in order to obtain a full

72 characterisation of the phenomenon in the computationally accessible spatial range ( $N \leq 256$ ).

## 73 **Autonomous turnover in model metacommunities**

74 For small ( $N \leq 8$ ) metacommunities assembled to saturation in regional diversity  $\gamma$ , popu-  
75 lations attain equilibria, implying the absence of autonomous turnover (16). With increasing  
76 metacommunity size  $N$ , however, we observe the emergence of steady-state population dynam-  
77 ics (Fig. S3, <https://vimeo.com/379033867>) that can produce substantial turnover in  
78 local community composition. This autonomous turnover can be represented through Bray-  
79 Curtis (20) (BC) similarity matrices comparing local community composition through time,  
80 and quantified by the number of compositional states detected in such matrices using hierarch-  
81 ical cluster analysis (19).

82 At intermediate spatial scales (Fig. 1,  $16 \leq N \leq 32$ ) we often find oscillatory dynam-  
83 ics, which can be perfectly periodic or slightly irregular. With increasing oscillation amp-  
84 litude, these lead to persistent turnover dynamics where local communities repeatedly fluctuate  
85 between a small number of distinct compositional states (represented in Fig. 1 by stripes of high  
86 pairwise BC similarity spanning large temporal ranges). At even larger scales ( $N \geq 64$ ) this  
87 compositional coherence begins to break down, and for very large metacommunities ( $N \geq 128$ )  
88 autonomous dynamics drive continuous and unpredictable change in community composition.

89 Metacommunities in which the boundaries of species ranges along environmental gradi-  
90 ents are clumped are termed *Clementsian*, while those for which range limits are independently  
91 distributed are denoted *Gleasonian* (21). We consider the block structure of the temporal dis-  
92 similarity matrix at intermediate  $N$  to be a form of Clementsian temporal turnover, character-  
93 ized by sudden significant shifts in community composition. Metacommunity models similar  
94 to ours have been found to generate such patterns along spatial gradients (22), potentially via

95 an analogous mechanism (23). Large, diverse metacommunities manifest Gleasonian temporal  
96 turnover. In such cases, species invasions and extirpations are largely independent and temporal  
97 occupancies predominantly uncorrelated, such that compositional change is continuous, rarely,  
98 if ever, reverting to the same state.

## 99 **Mechanistic explanation of autonomous turnover**

100 We explain the emergence of autonomous turnover in large metacommunities building on exist-  
101 ing analytic theory for isolated LV communities. Application of methods from statistical mech-  
102 anics to models of large isolated LV communities with random interactions has revealed that  
103 such models exhibit qualitatively distinct phases (24–26). If the number of modelled species,  
104  $S$ , interpreted as species pool size, lies below some threshold value determined by the distribu-  
105 tion of interaction strengths (Fig. S4), these models exhibit a unique linearly stable equilibrium.  
106 This characterizes the so-called unique fixed point (UFP) phase. Some species may go extinct,  
107 but the majority persists (26). When pool size  $S$  exceeds this threshold, there appear to be no  
108 more linearly stable equilibrium configurations. Any community formed by a selection from  
109 the  $S$  species is either unfeasible (there is no equilibrium with all species present), intrinsically  
110 linearly unstable, or invadable by at least one of the excluded species. This has been called the  
111 multiple attractor (MA) phase (25). However, the precise nature of dynamics in this MA phase  
112 appears to remain unclear.

113 Ecological models have been shown to easily exhibit attractors called stable heteroclinic net-  
114 works (27), which are characterized by dynamics in which the system bounces around between  
115 several unstable equilibria, each corresponding to a different composition of the extant com-  
116 munity, implying indefinite community turnover. As these attractors are approached, such mod-  
117 els exhibits increasingly long intermittent phases of slow dynamics, which, when numerically

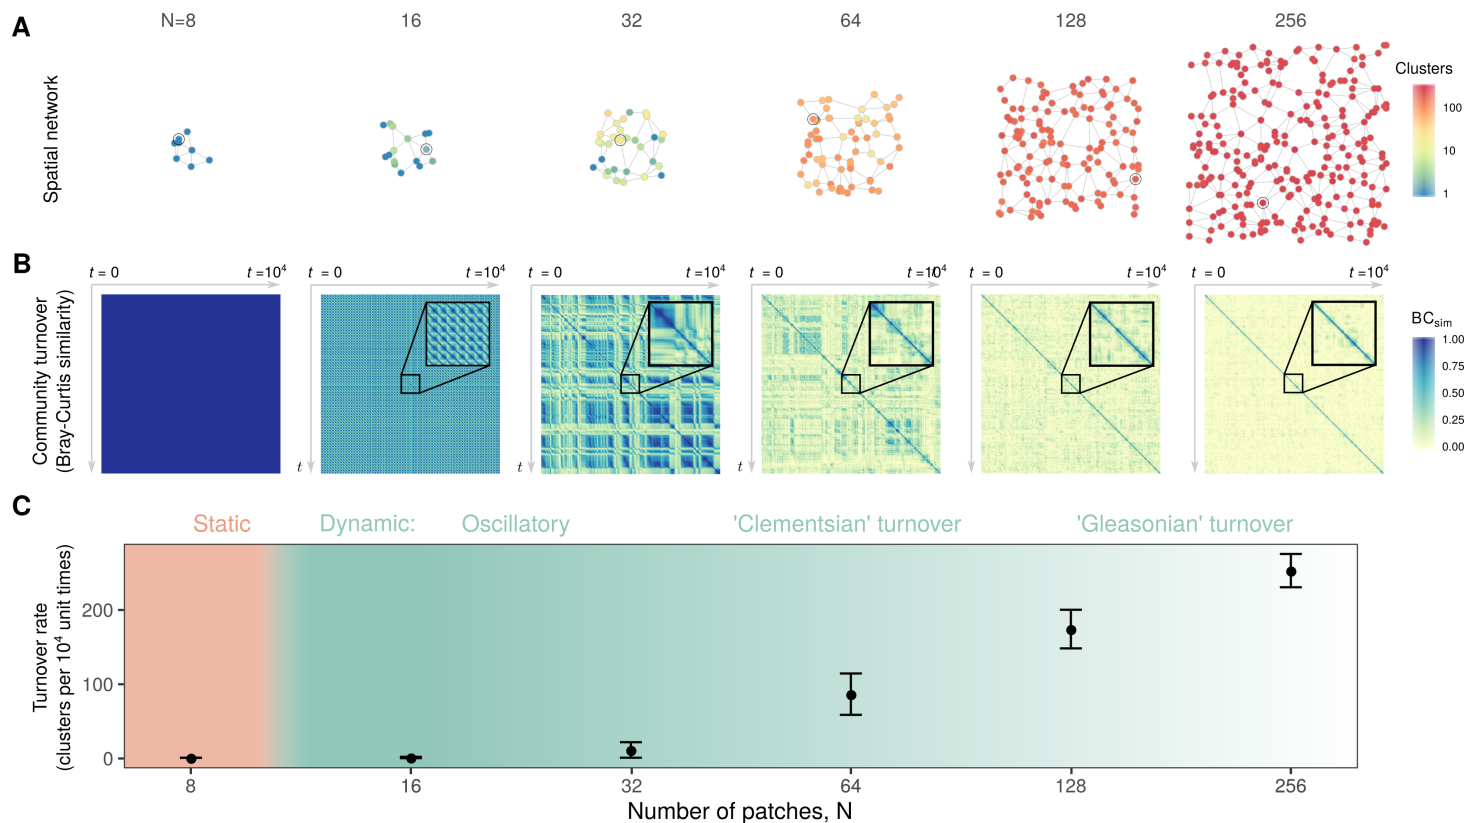

**Figure 1: Autonomous turnover in large model metacommunities.** **A:** Typical metacommunity models: a spatial network with nodes representing local communities (or patches) and edges, channels of dispersal. Node colour represents the number of local compositional states detected in  $10^4$  unit times using hierarchical clustering of the Bray-Curtis (BC) similarity matrix (19). **B:** Colour coded matrices of pairwise temporal BC similarity corresponding to the circled nodes in **A**. Insets represent  $10^2$  unit times. For small networks ( $N = 8$ ) local composition converges on static fixed points. As metacommunity extent increases, however, steady state dynamics emerge. Initially this autonomous turnover is oscillatory in nature with communities fluctuating between small numbers of compositional states which can be grouped into clusters ( $16 \leq N \leq 32$ ). Intermediate metacommunities ( $32 \leq N \leq 64$ ) manifest ‘Clementsian’ temporal turnover, characterized by sharp transitions in composition, implying species turn over in cohorts. Large metacommunities ( $N \geq 128$ ) turn over continuously, implying ‘Gleasonian’ assembly dynamics in which species’ temporal occupancies are independent. **C:** The mean number of local compositional clusters detected for metacommunities of various numbers of patches  $N$ . While the transition from static to dynamic community composition at the local scale is sharp (see text), non-uniform turnover *within* metacommunities (**A**) blurs the transition at the regional scale.  $A_{ij} = 0.5$  with probability 0.5,  $\phi = 10$ ,  $\sigma^2 = 0.01$ ,  $\ell = 0.5$ .

118 simulated, can give the impression that the system eventually reaches one of several ‘stable’  
119 equilibria. We demonstrate in supplementary text that the MA phase is in fact characterized  
120 by stable heteroclinic networks (Figs. S5, S6). We retain the MA terminology here because  
121 the underlying complete heteroclinic networks, interpreted as a directed graph (28, 29), might  
122 have multiple components that are mutually unreachable through dynamic transitions (30), each  
123 representing a different attractor.

124 **Spatially implicit metacommunities:** To demonstrate the effect of approximate heteroclinic  
125 networks in speciose ecological models, we constructed a single-patch ‘metacommunity’ model:  
126 an isolated LV community coupled to an implicitly modelled local ecological neighbourhood.  
127 This is achieved by adding, for each of the  $S$  species, a propagule rain at a low rate  $\epsilon$  (Eq. S5).  
128 This small perturbation, analogous to mass effects occurring in spatially explicitly metacom-  
129 munity models, brings the underlying heteroclinic network in the MA phase to life (see supple-  
130 mentary text): because natural rates of population growth/decline are of order  $O(1)$  or smaller  
131 for this model (31), it prevents population biomasses from falling below levels of magnitude  
132  $O(\epsilon)$  and inhibits the indefinite slowing down of community turnover in the heteroclinic net-  
133 work. Here we show results for  $\epsilon = 10^{-10}$  and  $10^{-15}$ , which produce qualitatively similar  
134 outcomes: with increasing pool size  $S$  we observe a transition from stable equilibria into dy-  
135 namic states in which community composition continuously turns over (32).

136 To characterize this transition quantitatively, we again performed hierarchical cluster ana-  
137 lyses of the temporal BC similarity matrix in the model’s steady state (Fig. 2A-B). For  $S < 35$   
138 (in the chosen parameterization) a single cluster was detected, generally corresponding to an  
139 equilibrium state, in rare cases superimposed with weak oscillations (Fig. 2, inset). For  $S \geq 35$ ,  
140 autonomous compositional turnover becomes increasingly likely. Community composition can  
141 then be organised into multiple clusters, reflecting the passage of the community state past



142 multiple perturbed equilibria along the paths set out by the heteroclinic network of the under-  
143 lying unperturbed model (Fig. 2C). As  $S$  increases, so does the complexity of the underlying  
144 attracting heteroclinic network and hence the variety of ways in which communities can form  
145 and change through time. A numerical threshold of around 35 species is consistent with the  
146 theoretical prediction (25) of  $S \approx 32$  for the transition between the UFP and MA phases (sup-  
147 plementary text).

148 **Spatially explicit metacommunities:** To test whether the same mechanism drives turnover in  
149 spatially explicit metacommunity models, we defined the species pool size for a given local  
150 community as the time averaged number of species with  $B_{ix} > 10^{-15}$  in the local neighbour-  
151 hood, i.e. the focal patch or any adjacent patch. Under variation of metacommunity size  $N$ , we  
152 found, for systems of more than 16 local communities, a positive linear association between  
153 the number of compositional clusters detected in the time series of a focal node and the species  
154 richness of the local neighbourhood (Fig. 2D;  $p < 10^{-6}$ ). (For  $N \leq 16$  the association was  
155 non-significant because most communities were static.) Remarkably, these linear regression  
156 lines combined trace a relation between neighbourhood richness and cluster number that is very  
157 similar to that found for the single-patch model (Fig. 2D). Furthermore, the phenomenology of  
158 the gradual emergence of autonomous turnover is consistent between the single-patch model  
159 and the full metacommunity model, including the progression from oscillations, through Clem-  
160 entsian turnover, to Gleasonian turnover with increases in  $S$  (Fig. S7). Thus, by analogy with  
161 the single-patch LV community model, we conclude that the autonomous turnover observed  
162 in large metacommunity models is best explained by the emergence of complex, approximate  
163 heteroclinic networks at the local scale.

164 We have demonstrated that propagule pressure is required to perturb a local community  
165 away from unstable equilibria and drive compositional change. In order to invade, however,

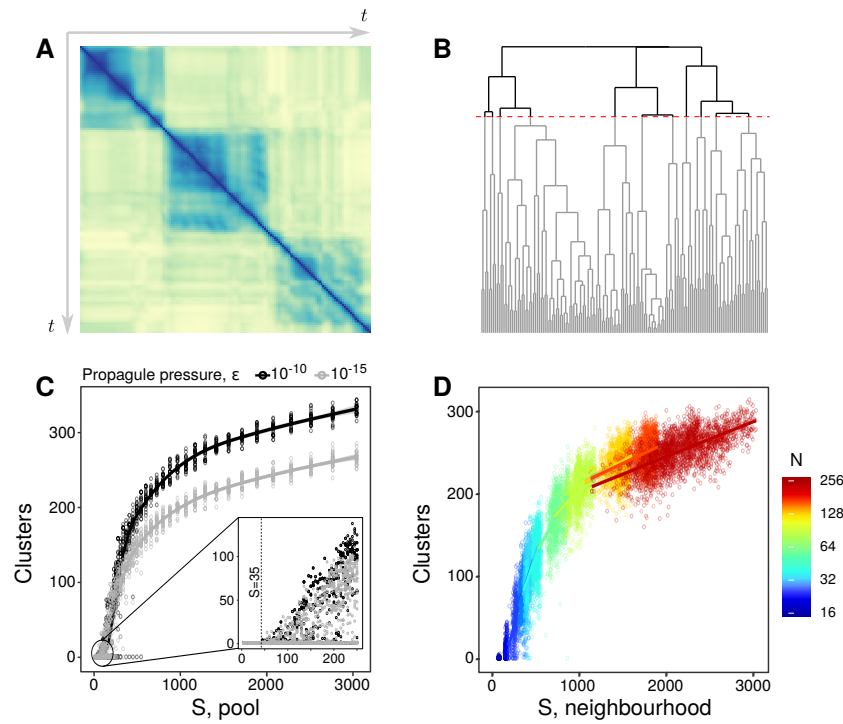

**Figure 2: Ecological mass effects drive autonomous turnover.** **A:** Compositional clustering represented by the block structure of the BC similarity matrix (200 unit times). **B:** Hierarchical cluster analysis approximately quantifies the number of compositional states with a similarity threshold of 75% (red dashed line) (19). **C:** The number of compositional clusters detected, plotted against the size of the pool of potential invaders for an isolated LV community using a propagule pressure  $\epsilon$  of  $10^{-10}$  and  $10^{-15}$ , fit with a generalized additive model (33). For  $S < 35$  a single cluster is detected. For  $S \geq 35$  autonomous turnover occurs ( $\geq 1$  compositional clusters) with the transition indicated by the dashed line (inset). **D:** Qualitatively identical behaviour was observed for model metacommunities in which ‘propagule pressure’ arises due to ecological mass effects from the local neighbourhood. Each point represents a single node. Lines in **D** are standard linear regressions. The good alignment of subsequent fits demonstrates that neighbourhood diversity is the dominating predictor of cluster number, rather than  $N$ .  $N = 16, 32, 48, 64, 80, 96, 128, 160, 192, 224, 256$ ,  $A_{ij} = 0.5$  with probability 0.5,  $\phi = 10$ ,  $\sigma^2 = 0.01$ ,  $\ell = 0.5$ .

166 species need to be capable of passing through biotic and abiotic filters. We would expect, there-  
167 fore, that turnover would be suppressed in highly heterogeneous or poorly connected environ-  
168 ments where mass effects are weak. Manipulating the parameters  $\phi$ ,  $\sigma^2$  and  $\ell$ , this is precisely  
169 what we observe (Fig. S8).

170 **Autonomous turnover and local ecological limits:** Species richness in LV systems subject to  
171 invasion pressure is ultimately regulated by the onset of ecological structural instability (16,31):  
172 in species rich, structurally unstable communities, press perturbations easily lead to extinctions.  
173 The boundary between the UFP and MA phases coincides exactly with the onset of structural in-  
174 stability (Eqs. S6-S12), implying that the emergence of biodiversity regulation and of autonom-  
175 ous turnover are tightly linked. For metacommunities, we demonstrate this linkage numeric-  
176 ally in Fig. 3 by showing that, as regional species richness increases, the onset of autonomous  
177 turnover coincides with the saturation of local species richness. Autonomous turnover might  
178 therefore serve as an indication of the structural instability of complex communities.

## 179 **The macroecology of autonomous turnover**

180 We find surprising similarities between temporal and spatio-temporal biodiversity patterns emer-  
181 ging in model metacommunities and in empirical data (Fig. 4), with quantitative characteristics  
182 lying within the ranges observed in natural ecosystems.

183 **Temporal occupancy:** The proportion of time in which species occupy a community tends  
184 to have a bi-modal empirical distribution (34–36) (Fig. 4A). The distribution we found in sim-  
185 ulations (Fig. 4E) closely matches the empirical pattern.

186 **Community structure:** Temporal turnover has been posited to play a stabilizing role in the  
187 maintenance of community structure (37,38). In an estuarine fish community (39), for example,

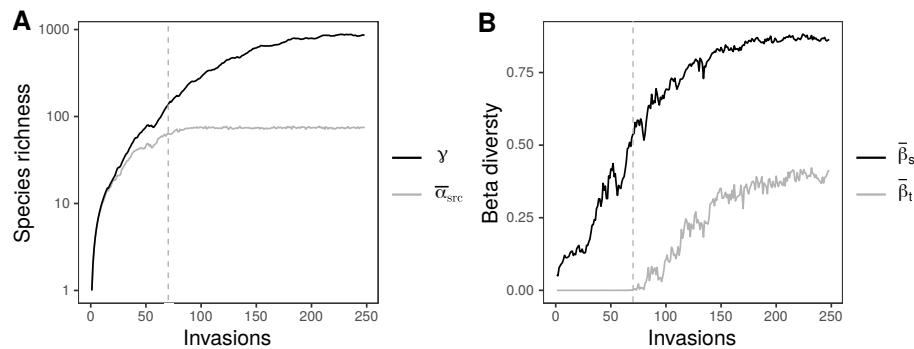

**Figure 3: The emergence of temporal turnover during metacommunity assembly.** **A:** Species richness at local ( $\bar{\alpha}_{\text{src}}$ , grey) and regional scales ( $\gamma$ , black) for a single metacommunity of  $N = 32$  coupled communities during iterative invasion of random species. We quantify local source diversity  $\bar{\alpha}_{\text{src}}$  as the metacommunity average of the number  $\alpha_{\text{src}}$  of non-zero equilibrium populations persisting when immigration is switched off (off-diagonal elements of  $\mathbf{D}$  set to zero), since this is the component of a local community subject to strict ecological limits to biodiversity. Note the log scale chosen for easy comparison of local and regional richness. **B:** Increases in regional diversity beyond local limits arise via corresponding increases in spatial turnover ( $\bar{\beta}_s$ , black). Autonomous temporal turnover ( $\bar{\beta}_t$ , grey) sets in precisely when average local species richness  $\bar{\alpha}_{\text{src}}$  has reached its limit, reflecting the equivalence of the transition to the MA phase space and the onset of local structural instability. In both panels, the dashed line marks the point at which autonomous temporal turnover was first detected.  $A_{ij} = 0.3$  with probability 0.3,  $\phi = 10$ ,  $\sigma^2 = 0.01$ ,  $\ell = 0.5$ .

188 species richness (Fig. 4B) and the distribution of abundances were remarkably robust despite  
189 changes in population biomasses by multiple orders of magnitude. In model metacommunities  
190 with autonomous turnover we found, likewise, that local species richness exhibited only small  
191 fluctuations around the steady-state mean (Fig. 4F, three random local communities shown)  
192 and that the macroscopic structure of the community was largely time invariant (Fig. S9). In  
193 the light of our results, we propose the absence of temporal change in community properties  
194 such as richness or abundance distribution despite potentially large fluctuations in population  
195 abundances (39) as an indication of predominantly autonomous ecological dynamics.

196 **The Species-Time-Area-Relation, STAR:** The species-time-relation (STR), typically fit  
197 by a power law of the form  $S \propto T^w$ , describes how observed species richness increases with  
198 observation time  $T$ . The exponent  $w$  of the STR has been found to be remarkably consistent  
199 across taxonomic groups and ecosystems (40–42), indicative of some general population dy-  
200 namical mechanism. However, the exponent of the STR decreases with increasing sampling  
201 area (40), and the exponent of the empirical Species Area Relation (SAR) ( $S \propto A^z$ ) consist-  
202 ently decreases with increasing sampling duration (40) (Fig. 4C, D). We tested for this pattern  
203 in a large simulated metacommunity with  $N = 256$  patches by computing the STAR for nested  
204 subdomains and variable temporal sampling windows (19). We observed exponents of the nes-  
205 ted SAR in the range  $z = 0.25$ - $0.60$  and for the STR a range  $w = 0.02$ - $0.48$  (Fig. S10), both  
206 in good agreement with observed values (41, 43). We also found a clear decrease in the rate of  
207 species accumulation in time as a function of sample area and vice-versa (Fig. 4G, H).

208 Thus, the distribution of temporal occupancy, the time invariance of key marcoecological  
209 structures and the STAR in model metacommunities match observed patterns. This evidence  
210 suggests that such autonomous dynamics cannot be ruled out as an important driver of temporal  
211 compositional change in natural ecosystems.

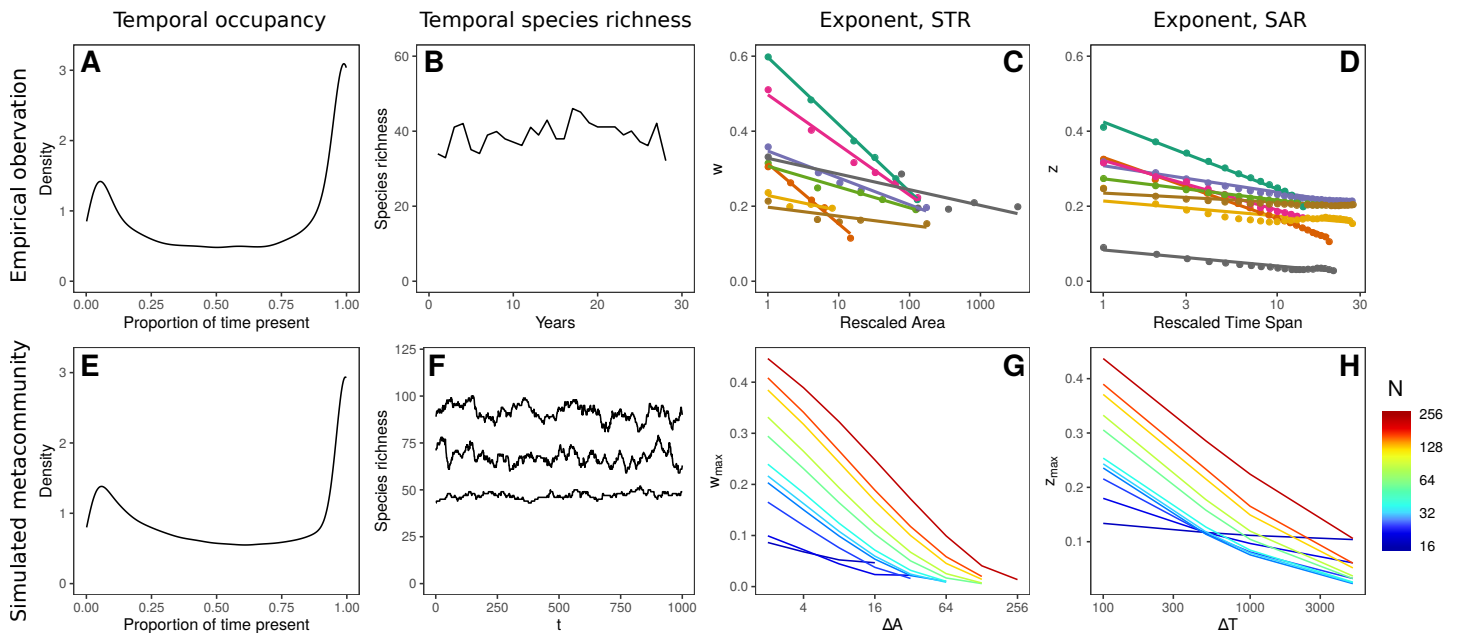

**Figure 4: Macroecological signatures of autonomous compositional change.** A bimodal distribution in temporal occupancy observed in North American birds (34) (A) and in simulations (E,  $N = 64$ ,  $\phi = 5$ ,  $\sigma^2 = 0.01$ ,  $\ell = 0.5$ ). Intrinsically regulated local species richness observed in estuarine fish species (39) (B) and in simulations (F,  $N = 64$ ,  $\phi = 5$ ,  $\sigma^2 = 0.01$ ,  $\ell = 0.5$ ). The decreasing slopes of the STR with increasing sample area (40) (C), and the SAR with increasing sample duration (40) (D) for various communities and in simulations (G and H,  $N = 256$ ,  $\phi = 10$ ,  $\sigma^2 = 0.01$ ,  $\ell = 0.5$ ). In C and D we have rescaled the sample area/duration by the smallest/shortest reported value and coloured by community (see original study for details). In G and H we study the STAR in metacommunities of various size  $N$ , represented by colour. Limited spatio-temporal turnover in the smallest metacommunities (blue colours) greatly reduces the exponents of the STAR relative to large metacommunities (red colours).  $A_{ij} = 0.5$  with probability 0.5 in all cases.

## 212 **Conclusions**

213 Current understanding of the mechanisms driving temporal turnover in ecological communities  
214 is predominantly built upon phenomenological studies of observed patterns (44) and is unques-  
215 tionably incomplete (39, 45). That temporal turnover can be driven by external forces – seasonal  
216 or long term climate change, direct anthropogenic pressures etc. – is indisputable. A vitally im-  
217 portant question is, however, how much empirically observed compositional change is actually  
218 due to such forcing. A recent landmark analysis of temporal patterns in biodiversity detected  
219 no systematic change in species richness or structure in natural communities, despite rates of  
220 compositional turnover greater than predicted by null models (1–3, 46). Here we have shown  
221 that empirically realistic turnover in model metacommunities can occur via precisely the same  
222 mechanism as that responsible for regulating species richness at the local scale. While the pro-  
223 cesses regulating diversity in natural communities remain poorly understood, our theoretical  
224 work suggests local structural instability may explain these empirical observations in a unified  
225 and parsimonious way.

226 Simulations reveal a qualitative transition from small to large metacommunities. For com-  
227 munities of species such as marine mammals or large fish whose ranges can extend across entire  
228 macroclimatic niches, one might plausibly expect that autonomous turnover is absent. For or-  
229 ganisms with ranges that are small compared to their macroclimatic niches, on the other hand,  
230 autonomous turnover of local communities can plausibly be expected based on our findings.  
231 Empirically distinguishing between these two cases for different guilds will be an important  
232 task for the future.

233 At intermediate spatial scales, autonomous turnover is characterized by sharp transitions  
234 between cohesive compositional states. To date, few empirical analyses have reported such co-  
235 herence in temporal turnover, perhaps because the taxonomic and temporal resolution required

236 to detect such patterns is not yet widely available. Developments in biomonitoring technolo-  
237 gies (47) are likely to reveal a variety of previously undetected ecological dynamics, however.  
238 By combining high resolution temporal sampling and metagenetic analysis of community com-  
239 position, a recent study demonstrated cohesive but short-lived community cohorts in coastal  
240 plankton (48). Such Clementsian temporal turnover may offer a useful signal of autonomous  
241 compositional change in real systems.

242 Thus, overcoming previous computational limits to the study of complex metacommunities  
243 (49, 50), we have discovered the existence of two distinct phases of metacommunity ecology—  
244 one characterized by weak or absent autonomous turnover, the other by continuous composi-  
245 tional change in the absence of external drivers. By synthesizing a wide range of established  
246 ecological theory (16, 25, 27, 49), we were able to heuristically explain these phases. Our ex-  
247 planation implies that autonomous turnover requires little more than a diverse neighbourhood of  
248 potential invaders, a weak immigration pressure, and a complex network of interactions between  
249 co-existing species.

250 **Acknowledgements:** We thank Lars Chittka and Laurent Frantz for comments on earlier  
251 drafts of this paper. **Funding:** This work forms part of the project “Mechanisms and prediction  
252 of large-scale ecological responses to environmental change” funded by the Natural Environ-  
253 ment Research Council (NE/T003510/1). **Author contributions:** AGR conceived of the study.  
254 JDO and AGR designed the model. JDO developed the model, performed simulations, analysed  
255 the data and drafted the manuscript. All authors interpreted model outputs in comparison with  
256 observations and contributed to manuscript writing. **Competing interests:** The authors declare  
257 no competing interests. **Data and materials availability:** Should this manuscript be accepted  
258 simulation data supporting the results will be archived in a public repository and the data DOI  
259 will be included at the end of the article.



## 260 **References and Notes**

- 261 1. M. Dornelas, *et al.*, *Science* **344**, 296 (2014).
- 262 2. N. J. Gotelli, *et al.*, *Science Advances* **3**, e1700315 (2017).
- 263 3. M. Vellend, *et al.*, *Proceedings of the National Academy of Sciences of the United States of*  
264 *America* **110**, 19456 (2013).
- 265 4. R. J. Hobbs, S. Yates, H. A. Mooney, *Ecological Monographs* **77**, 545 (2007).  
266 WOS:000250915400004.
- 267 5. C. Kampichler, C. A. M. van Turnhout, V. Devictor, H. P. van der Jeugd, *PloS One* **7**,  
268 e35272 (2012).
- 269 6. T. Newbold, *et al.*, *Nature* **520**, 45 (2015).
- 270 7. N. G. Swenson, *et al.*, *Ecology* **93**, 490 (2012).
- 271 8. J. H. Connell, R. O. Slatyer, *The American Naturalist* **111**, 1119 (1977).
- 272 9. B. L. Brown, R. L. Lawson, *Ecology* **91**, 1799 (2010).
- 273 10. J. Elith, J. R. Leathwick, *Annual Review of Ecology, Evolution, and Systematics* **40**, 677  
274 (2009).
- 275 11. M. Kearney, W. Porter, *Ecology Letters* **12**, 334 (2009).
- 276 12. S. P. Hubbell, *The Unified Neutral Theory of Biodiversity and Biogeography (MPB-32)*  
277 (Princeton University Press, 2001).

- 278 13. European Commission, Common Implementation Strategy for the Water Framework Dir-  
279 ective (2000/60/EC), Guidance Document no. 5, Official journal of the European com-  
280 munities (2003).
- 281 14. European Commission, Common Implementation Strategy for the Water Framework Dir-  
282 ective (2000/60/EC), Guidance Document no. 10, Official journal of the European com-  
283 munities (2003).
- 284 15. A. E. Magurran, *et al.*, *Proceedings of the National Academy of Sciences* **115**, 1843 (2018).
- 285 16. J. D. O’Sullivan, R. J. Knell, A. G. Rossberg, *Ecology Letters* **22**, 1428 (2019).
- 286 17. M. A. Leibold, *et al.*, *Ecology Letters* **7**, 601 (2004).
- 287 18. K. R. Gabriel, R. R. Sokal, *Systematic Zoology* **18**, 259 (1969).
- 288 19. Detailed Materials and Methods are available as Supplementary Materials.
- 289 20. J. R. Bray, J. T. Curtis, *Ecological Monographs* **27**, 325 (1957).
- 290 21. M. A. Leibold, G. M. Mikkelsen, *Oikos* **97**, 237 (2002).
- 291 22. K. Liataud, E. H. van Nes, M. Barbier, M. Scheffer, M. Loreau, *Ecology Letters* **22**, 1243  
292 (2019).
- 293 23. J.-F. Arnoldi, M. Barbier, R. Kelly, G. Barabás, A. L. Jackson, *Preprint at ht-*  
294 *tps://www.biorxiv.org/content/10.1101/705756v2* p. 705756 (2019).
- 295 24. H. Rieger, *Journal of Physics A: Mathematical and General* **22**, 3447 (1989).
- 296 25. G. Bunin, *Physical Review E* **95**, 042414 (2017).
- 297 26. T. Galla, *EPL (Europhysics Letters)* **123**, 48004 (2018).

- 298 27. J. Hofbauer, *Equadiff* 8 pp. 105–116 (1994).
- 299 28. R. Law, R. D. Morton, *Ecology* **74**, 1347 (1993).
- 300 29. D. A. Kessler, N. M. Shnerb, *Physical Review E* **91**, 042705 (2015).
- 301 30. S. N. Dorogovtsev, J. F. F. Mendes, A. N. Samukhin, *Physical Review E* **64**, 025101 (2001).
- 302 31. A. G. Rossberg, *Food Webs and Biodiversity: Foundations, Models, Data* (John Wiley &  
303 Sons, 2013).
- 304 32. F. Roy, M. Barbier, G. Biroli, G. Bunin, *Preprint at ht-*  
305 *tps://www.biorxiv.org/content/10.1101/730820v1* (2019).
- 306 33. T. J. Hastie, R. J. Tibshirani, *Monographs on statistics and applied probability* p. 15 (1990).
- 307 34. J. R. Coyle, A. H. Hurlbert, E. P. White, *The American Naturalist* **181**, E83 (2013).
- 308 35. M. F. Jenkins, E. P. White, A. H. Hurlbert, *PeerJ* **6** (2018).
- 309 36. S. J. S. Taylor, B. S. Evans, E. P. White, A. H. Hurlbert, *Ecology* **99**, 1825 (2018).
- 310 37. D. F. Doak, *et al.*, *The American Naturalist* **151**, 264 (1998).
- 311 38. D. Tilman, C. L. Lehman, C. E. Bristow, *The American Naturalist* **151**, 277 (1998).
- 312 39. A. E. Magurran, P. A. Henderson, *Philosophical Transactions of the Royal Society B: Bio-*  
313 *logical Sciences* **365**, 3611 (2010).
- 314 40. P. B. Adler, *et al.*, *Ecology* **86**, 2032 (2005).
- 315 41. E. P. White, *et al.*, *Oikos* **112**, 185 (2006).

- 316 42. A. Shade, J. G. Caporaso, J. Handelsman, R. Knight, N. Fierer, *The ISME Journal* **7**, 1493  
317 (2013).
- 318 43. S. Drakare, J. J. Lennon, H. Hillebrand, *Ecology Letters* **9**, 215 (2006).
- 319 44. E. P. White, M. A. Gilchrist, *Evolutionary Ecology Research* **9**, 1329 (2007).
- 320 45. A. E. Magurran, M. Dornelas, F. Moyes, P. A. Henderson, *Global Ecology and Biogeo-*  
321 *graphy* **28**, 1949 (2019).
- 322 46. F. A. M. Jones, A. E. Magurran, *Biology Letters* **14**, 20180187 (2018).
- 323 47. D. A. Bohan, *et al.*, *Trends in Ecology & Evolution* **32**, 477 (2017).
- 324 48. A. M. Martin-Platero, *et al.*, *Nature Communications* **9**, 1 (2018).
- 325 49. R. Law, M. A. Leibold, *Metacommunities: Spatial Dynamics and Ecological Communities*,  
326 M. Holyoak, M. A. Leibold, R. D. Holt, eds. (University of Chicago Press, 2005).
- 327 50. M. Hamm, B. Drossel, *Preprint at* <https://www.biorxiv.org/content/10.1101/810390v1>  
328 (2019).

## 329 **Supplementary references**

- 330 51. R. J. Adler, *The Geometry of Random Fields* (SIAM, 2010).
- 331 52. R. A. Johnson, D. W. Wichern, *Applied Multivariate Statistical Analysis*, vol. 5 (Prentice  
332 hall Upper Saddle River, NJ, 2002).
- 333 53. T. King, S. Butcher, L. Zalewski (2017).
- 334 54. J. Oksanen, *et al.*, *Community ecology package, version 2* (2013).

- 335 55. P. Legendre, L. Legendre, *Numerical Ecology* (Elsevier, 2012), third edn.
- 336 56. A. Baselga, *Methods in Ecology and Evolution* **8**, 799 (2017).
- 337 57. A. Baselga, C. D. L. Orme, *Methods in Ecology and Evolution* **3**, 808 (2012).
- 338 58. J. B. Shurin, *et al.*, *Ecology Letters* **10**, 127 (2007).
- 339 59. R. Ptacnik, *et al.*, *Proceedings of the National Academy of Sciences* **105**, 5134 (2008).
- 340 60. R. Ptacnik, T. Andersen, P. Brettum, L. Lepistö, E. Willén, *Proceedings of the Royal Society*  
341 *B: Biological Sciences* **277**, 3755 (2010).
- 342 61. J. J. Korhonen, J. Soininen, H. Hillebrand, *Ecology* **91**, 508 (2010).
- 343 62. J. C. Stegen, *et al.*, *Global Ecology and Biogeography* **22**, 202 (2013).

## 344 **Supplementary materials**

345 **Materials and Methods**

346 **Supplementary text**

347 **Figs. S1 – S10**

## 348 **Materials and Methods**

349 **Metacommunity assembly:** The dynamics of local population biomasses  $B_{ix}(t)$  were  
350 modelled using a spatial extension to the multispecies Lotka-Volterra competition model (16):

$$\frac{dB_{ix}}{dt} = B_{ix} \left( R_{ix} - \sum_{j=1}^S A_{ij} B_{jx} \right) - e B_{ix} + \sum_{y \in \mathcal{N}(x)} \frac{e}{k_y} \exp(-d_{xy} \ell^{-1}) B_{iy}. \quad (\text{S1})$$

351 The competitive coupling coefficients  $A_{ij}$  for  $i \neq j$  were sampled from discrete distributions.  
352 Generally,  $A_{ij}$  were set to 0.5 with a probability of 0.5 and to 0 otherwise, however, for the  
353 simulation shown in Fig. 3, we relaxed the dynamic coupling and instead set  $A_{ij}$  to 0.3 with a  
354 probability of 0.3. This delayed the onset of local structural instability during metacommunity  
355 assembly, making the coincident emergence of local diversity regulation and autonomous com-  
356 positional turnover visually clearer.

357 Environmental heterogeneity was modelled implicitly through spatial variation in species'  
358 intrinsic growth rates  $R_{ix}$ . Specifically, the  $R_{ix}$  were sampled independently for each species  $i$   
359 from a Gaussian random field (51) with mean  $\mu = 1.0$  and standard deviation  $\sigma$ , generated via  
360 spectral decomposition (52) of the  $N \times N$  landscape covariance matrix with elements  $\Sigma_{xy} =$   
361  $\exp[-\phi^{-1} d_{xy}]$ , where  $d_{xy}$  denotes the Euclidean distances between patches  $x$  and  $y$ , and  $\phi$  the  
362 autocorrelation length (Fig. S1).

363 The dispersal matrix  $\mathbf{D}$  (Eq. (1)) has diagonal elements  $D_{xx}$  of  $-e$ , where  $e$ , the fraction  
364 of biomass leaving patch  $x$  per unit time, was kept fixed at 0.01 for all simulations. For pairs

365 of nodes connected by an edge in the spatial network, the immigration terms were modelled as  
366 negative exponentials  $D_{xy} = ek_y^{-1} \exp(-d_{xy}\ell^{-1})$ , controlled by a dispersal length parameter  $\ell$ ,  
367 thus assuming a propensity for propagules to transition to nearby sites. The normalisation con-  
368 stant  $k_y$  divides the biomass departing patches  $y$  between all other patches in *its* local neighbour-  
369 hood ( $\mathcal{N}(y)$ ), weighted by the ease of reaching each patch i.e.  $k_y = \sum_{z \in \mathcal{N}(y)} \exp(-d_{yz}\ell^{-1})$ ,  
370 implying an active dispersal process.

371 Metacommunities were assembled through a stepwise invasion process. In each iteration  
372 of the algorithm,  $0.05S + 1$  new species were introduced to the the metacommunity, with  $S$   
373 denoting the current extant species richness. The invaders were tested to ensure positive growth  
374 rates at low abundance, and then added at  $10^{-6}$  biomass units to the local community in which  
375 their growth rate was highest. The metacommunity was periodically scanned and species with  
376 biomass smaller than  $10^{-4}$  biomass units in all nodes of the network were considered regionally  
377 extinct and removed from the model. The assembly algorithm aims to remove all species whose  
378 total biomass declines to zero in the course of the system's complex dynamics. In rare cases  
379 autonomous fluctuations may drive one of the remaining species to very low abundance in all  
380 nodes, however the majority retain local biomass above the detection threshold in at least one  
381 node at all times.

382 To assemble models of sufficient spatial extent and species richness, we developed a paral-  
383 lel implementation of the assembly algorithm based on a domain decomposition of the spatial  
384 network, and simulated it on the high-performance cluster at Queen Mary, University of Lon-  
385 don (53). This permitted assembly of saturated metacommunities of up to  $N = 256$  patches  
386 harbouring  $S \sim 3000$  species, thus breaking through frequently lamented computational lim-  
387 its (49, 50) on the numerical study of metacommunities.

388 **Quantifying autonomous turnover:** For fully assembled metacommunities, we simu-  
389 lated and stored time series of  $t_{\max} = 10^4$  metacommunity samples  $B_{ixt} = B_{ix}(t)$  taken in  
390 intervals of one unit time. In these metacommunity timeseries, we measured spatio-temporal  
391 turnover based on i) compositional dissimilarity, ii) the distribution of temporal occupancy, iii)  
392 the number of compositional clusters detected using hierarchical clustering, and iv) via species  
393 accumulation curves generated using sliding spatial and temporal sampling windows. Metrics  
394 were selected in order to answer specific questions, or for comparison to observed patterns.  
395 Some analyses require quantifying local species richness. This was done by setting a detection  
396 threshold of  $10^{-4}$  biomass units, below which populations are considered absent from the com-  
397 munity. *Local source diversity*, which we define in Fig. 3, is a related but different diversity  
398 measure that is more adequate for quantifying the component of a local community subject to  
399 local ecological limits to biodiversity.

400 **Compositional dissimilarity:** Spatio-temporal compositional similarity was quantified us-  
401 ing the Bray-Curtis (20) similarity index via the function `vegdist` in the R package “ve-  
402 gan” (54).

403 **Temporal occupancy:** We assessed temporal occupancy by first converting biomass into  
404 presence-absence data ( $P_{ixt} = 1$  for all  $B_{ixt} > 10^{-4}$ , and 0 otherwise). Then, for all populations  
405 present at least once, we computed the temporal occupancy ( $TO_{ix}$ ) as the proportion of the time  
406 interval of length  $t_{\max}$  during which that population was present:

$$TO_{ix} = \frac{1}{t_{\max}} \sum_t P_{ixt} \quad (\text{S2})$$

407 **Hierarchical clustering:** We assessed the degree of temporal clustering in community com-  
408 position using complete linkage hierarchical clustering (55) of the Bray-Curtis similarity matrix,  
409 which gives an approximate measure of the number of unstable equilibria between which the



410 dynamical system fluctuates. We computed the number of clusters using a threshold of 75%  
411 similarity, which reflects the structure visible in pairwise dissimilarity matrices (Fig. 2A and  
412 B).

413 **Spatio-temporal species accumulation:** We studied the STR and SAR in model metacom-  
414 munities using a sliding window approach, asking how many species  $S^{\text{obs}}$  were detected in spa-  
415 tial ‘windows’, represented by connected sub-graphs of  $\Delta A$  nodes, during temporal windows  
416 of  $\Delta T$  unit times:

$$S^{\text{obs}} = \sum_i \left[ \sum_{t \in \Delta T} \sum_{x \in \Delta A} P_{ixt} \geq 1 \right] \quad (\text{S3})$$

417 where the Iverson brackets  $[.]$  denote the indicator function. Time windows with all possible  
418 starting points for a given window length were evaluated and analogously for the spatial sub-  
419 sampling, and then the average species richness for a given sample size computed. In closed  
420 systems, the species accumulation in both space and time must ultimately saturate, either when  
421 the entire metacommunity or entire time series is sampled. Thus we defined the exponents  $z$  and  
422  $w$  of the STAR as the maximum slopes of the SAR/STR on double logarithmic axes (Fig. S10).

## 423 **Supplementary text**

424 **Spatial parameterization:** Other than patch number  $N$ , the parameters that most im-  
425 pact the spatio-temporal structure of model metacommunities are the environmental correla-  
426 tion length  $\phi$ , the variability of the environment  $\sigma^2$ , and the dispersal length  $\ell$ . In order to  
427 understand the role of these parameters for autonomous turnover, we fixed  $N = 64$  and as-  
428 sembled metacommunity models with  $\sigma^2$ ,  $\ell = 1 \times 10^{-2}$ ,  $5 \times 10^{-2}$ ,  $1 \times 10^{-1}$ ,  $5 \times 10^{-1}$ , 1,  
429 and  $\phi = 1, 5, 10, 50, 100$  in all combinations and computed the resulting temporal beta  
430 diversity as the mean spatially averaged temporal BC dissimilarity observed in 10 replicates

431 of each parameterization. Rates of autonomous turnover varied in a complex but systematic  
432 way under variation in the spatial parameterization of the model, with turnover being weakly  
433 correlated with the dispersal length and maximized for intermediate habitat heterogeneity and  
434 autocorrelation (Fig. S2). Weak abiotic heterogeneity seeds the non-uniform spatial structure  
435 of the metacommunity and therefore promotes turnover. For large enough spatial networks,  
436 dispersal limitation and competitive repulsion alone are sufficient to drive steady state dynam-  
437 ics in perfectly uniform landscapes. The scan of the parameter space allowed selection the  
438 parameterization that maximized autonomous turnover:  $\phi = 10$ ,  $\sigma^2 = 0.01$ ,  $\ell = 0.5$  (peak in  
439 Fig. S2A). Using this combination of parameters we then assembled metacommunity models  
440 of  $N = 8, 16, 32, 48, 64, 80, 96, 128, 160, 192, 224, 256$ . By maximizing turnover in this  
441 way, we were able to explore the macroecological implications of autonomous turnover in the  
442 computationally accessible spatial range ( $N \leq 256$ ).

443 To some extent, the complex roles of parameters  $\phi$ ,  $\sigma^2$ , and  $\ell$ , shown in Fig. S2, can be dis-  
444 tilled into the effect on a single parameter: the time averaged spatial community dissimilarity  
445 at the local neighbourhood scale. To demonstrate this we used the multiple-site dissimilarity  
446 metric derived in Ref. (56), which generates an unbiased total beta diversity metric for sys-  
447 tems of three or more sites/time points, allowing direct comparison of beta diversity for local  
448 neighbourhoods of different numbers of nodes. Spatial  $\beta$ -diversity,  $\beta_s$ , was computed using  
449 the function `beta.multi.abund()` included in the R package ‘betapart’ (57). This metric  
450 partitions  $\beta$ -diversity into two components corresponding to species replacement and compos-  
451 itional nestedness. Here we report total dissimilarity only. Temporal turnover responded un-  
452 imodally to local neighbourhood dissimilarity (Fig. S8) over the parameter range of Fig. S2,  
453 suggesting that spatial parameterizations that maximise  $\beta_s$ , either through exaggerating abi-  
454 otic differences between adjacent local communities or dampening mass effects, can *elevate*  
455 neighbourhood diversity while simultaneously *suppressing* the pool of species that can actually

456 invade.

457 This result makes plausible why empirical studies have detected a range of statistical as-  
458 sociations between spatial and temporal turnover in natural ecosystems. Positive, negative,  
459 unimodal, and non-significant relationships have been reported between temporal turnover and  
460 species richness or spatial turnover (41), (58–62). The unimodal response, shown in Fig. S8  
461 may help to resolve these apparent contradictions: it is not species richness or spatial dissim-  
462 ilarity *per se* that best predict temporal turnover, but the size of the pool of species capable of  
463 passing through biotic and abiotic filters to invade a local community.

464 Note that for consistency we compute  $\beta_t$  in Fig. S8 using the BC dissimilarity as in Fig. S2,  
465 however the pattern is qualitatively unchanged if  $\beta_t$  is computed using alternative  $\beta$ -diversity  
466 metrics or cluster analysis as in the main text.

467 **Phase space of a generalised Lotka-Volterra community:** Analytic theory (25) predicts  
468 a sharp transition between what has been called the Unique Fixed Point (UFP) and Multiple  
469 Attractor (MA) phases. In Fig. S4 we reproduce the phase portrait for such a system and note  
470 that our explicitly modelled metacommunities reveal a gradual transition in the MA phase space  
471 from oscillatory, to Clementsian and into Gleasonian turnover regimes. Assuming large  $S$ , the  
472 sharp transition between UFP and MA phases has been shown (25) to occur at species richness

$$S = \frac{2}{(1 + \gamma)^2 \text{var}(A_{ij})}, \quad (\text{S4})$$

473 where  $\gamma = \text{corr}(A_{ij}, A_{ji})$  denotes the degree of correlation in the effects two species have on  
474 each other, measuring the symmetry of interspecific interaction strengths, and  $\text{var}(A_{ij})$  is the  
475 variance in the distribution. In our model we use a random interaction matrix for which  $\gamma = 0$ .  
476 We sample interaction coefficients from a discrete distribution with  $\text{var}(A_{ij}) = (0.25)^2$  giving

477 a predicted transition into the MA phase space at  $S = 32$  species. Thus, while the prediction  
478 is approximate for small  $S$  communities with non-uniform intrinsic growth rates, a numerically  
479 observed threshold of around 35 species in the isolated LV model (Fig. 2C inset) is consistent  
480 with these analytic predictions.

481 **Isolated LV communities:** To explore the emergence of heteroclinic networks in LV mod-  
482 els, we studied an isolated LV model with and without coupling to an implicitly modelled neigh-  
483 bourhood species pool. The dynamics of the model follow

$$\frac{d\mathbf{b}}{dt} = \mathbf{b} \circ (\mathbf{r} - \mathbf{A}\mathbf{b}) + \boldsymbol{\epsilon}, \quad (\text{S5})$$

484 where  $\mathbf{b}$  is a population biomass vector of length  $S$ ,  $\mathbf{r}$  is a vector of independent random normal  
485 variables with mean 1 and variance  $\sigma^2 = 0.01$  representing maximum intrinsic growth rates,  
486  $\mathbf{A}$  is a competitive overlap matrix and the vector  $\boldsymbol{\epsilon}$  represents the slow immigration of biomass  
487 corresponding to a weak propagule pressure. The elements  $\epsilon_i$  are analogous to explicitly  
488 modelled immigration terms  $B_{ix}D_{xy}$  of the full metacommunity model.

489 As in the metacommunity model, interspecific competition coefficients  $A_{ij}$  were set to 0.5  
490 with a probability of 0.5 for  $i \neq j$  and otherwise to zero, while  $A_{ii} = 1$ , for all  $i$ . We enforced  
491  $b_i > 0$  for all  $i$  by simulating dynamics in terms of logarithmic biomass variables. In simulating  
492 this model, we did not follow the common practice of removing species whose biomass drops  
493 below some threshold. Instead all species were retained. We consider two situations: with and  
494 without the inclusion of a weak propagule pressure  $\boldsymbol{\epsilon}$ .

495 **Heteroclinic networks in the case without propagule pressure:** We first demonstrate in  
496 simulations that, indeed, as predicted under certain constraints (27), stable heteroclinic net-  
497 works exist in the MA phase of model Eq. (S4) for  $\boldsymbol{\epsilon} = 0$ . For this we choose  $S = 300$ ,

598 which, with other parameters set as described above, brings us deeply into the MA phase of  
599 the model. Simulations were initialised by setting all  $B_i = 10^{-3}$  ( $1 \leq i \leq S$ ) at  $t = 0$ . The  
600 system was simulated until  $t = 2.1 \cdot 10^7$  and system states recorded at times  $t = 2.1 \cdot 10^{j/1000}$   
601 ( $0 \leq j \leq 7000$ ). As illustrated in Fig. S5, while dynamics tend to become slower for larger  
602  $t$ , no stable equilibrium or other simple attractor appears to be ever reached—as expected for a  
603 system approaching a heteroclinic network. Instead, as expected when a heteroclinic network  
604 exists, the system bounces around between unstable equilibria, apparently in a random fashion.  
605 Unexpected to us, however, the system appears to visit not only unstable equilibria in its tran-  
606 sient, but occasionally also unstable periodic orbits ( $t \approx 1.3 \cdot 10^4$  in Fig. S5) and perhaps more  
607 complex invariant sets ( $t \approx 1.2 \cdot 10^6$  in Fig. S5).

608 One might wonder whether there is any tendency for dynamics to eventually come to a halt.  
609 To study this question, we calculated the number of changes in community composition (species  
610 invasions and extinctions) between all pairs of subsequently recorded system states, where we  
611 considered a species  $i$  as “present” if  $B_i > 10^{-4}$ , and from this the momentary rate of change in  
612 composition on the  $\ln(t)$  scale by dividing by  $\ln(10^{1/1000})$ . In Fig. S6 we show the time series  
613 of the centred moving average over this number for 100 subsequent pairs or recordings, and  
614 averages for non-overlapping adjacent blocks for 300 pairs. Spikes where the rate of change is  
615 particularly high correspond to brief phases of regular or irregular oscillation. We performed a  
616 median regression of the block-wise averages by a power law (rate)  $\sim t^\nu$ . Median regression  
617 was used to de-emphasize the spikes. For the simulation shown in Fig. S5 found that  $\nu$  did not  
618 differ significantly from zero, implying a decline of the turnover rate on the natural time axis as  
619  $t^{-1}$ . When we repeated this analysis for 15 independent simulations (two of which failed due to  
620 numerical issues), we observed a tendency for  $\nu$  to be slightly positive ( $\nu = 0.054 \pm 0.020$ , t-test  
621  $t = 2.67$ ,  $p = 0.020$ ), perhaps because the effect of oscillatory phases on the mean turnover  
622 rate on the  $\ln(t)$ -scale increases with increasing  $t$ . Overall, however, the decline of turnover

523 rate approximately as  $t^{-1}$  was confirmed, providing evidence for the existence of an attracting  
524 heteroclinic network that the LV system Eq. (S5) with  $\epsilon = 0$  slowly approaches.

525 Use of logarithmic biomass variables was essential for these simulations. We found that  
526 median species biomass at the end of each run was typically around  $10^{-3,500,000}$ , much smaller  
527 than the smallest number representable by double precision floating point arithmetic, which is  
528 around  $2 \cdot 10^{-308}$ . Needless to say, these small numbers mean that the simulations with  $\epsilon = 0$   
529 are, while instructive, ecologically unrealistic.

530 **Heteroclinic networks in the case with propagule pressure:** The case  $\epsilon > 0$ , where dy-  
531 namics move alongside the underlying heteroclinic network without ever fully approaching it,  
532 is discussed in the Main Text as it provides a useful intermediate between the explicit metacom-  
533 munity model and the more tractable isolated community. In Fig. S7 we show that the transition  
534 from oscillatory to Clementsian and finally Gleasonian turnover regimes can also be observed  
535 in these isolated LV models ( $\epsilon_i = \epsilon = 10^{-15}$  for all  $i$ , other parameters as above).

536 **Local structural instability drives autonomous turnover:** Species richness in compet-  
537 itive LV communities is intrinsically limited by the onset of ecological structural instability.  
538 Here we show analytically that for isolated communities the boundary between the UFP and  
539 MA phases (25) is identical to the structurally unstable limit (31).

540 The transition between UFP and MA phase for competitive LV models occurs (25) when

$$\Phi = (u - \gamma v)^2, \quad (\text{S6})$$

541 where  $\Phi := S^*/S$  is the proportion of species persisting, i.e. the ratio between the number  $S^*$   
542 of species that persist and the pool size  $S$ , and again  $\gamma = \text{cor}(A_{ij}, A_{ji})$ . The quantities  $u$  and  $v$   
543 in Eq. (S6) are given by

$$u = \frac{1 - E[A_{ij}]}{S^{1/2} \text{std}(A_{ij})}, \quad (\text{S7})$$

544 with  $E[A_{ij}]$  and  $\text{std}(A_{ij})$  denoting mean and standard deviation of the distribution of off-  
545 diagonal entries of  $\mathbf{A}$ , respectively, and

$$v = \frac{\Phi}{u - \gamma v}. \quad (\text{S8})$$

546 For  $\gamma \neq 0$ , Eq. (S8) does not have a unique solution for  $v$ . The equivalent quadratic equation  
547  $\gamma v^2 - uv + \Phi = 0$  has two solutions, one of which diverges as  $\gamma \rightarrow 0$ ; this we discard. The  
548 other solution is

$$v = \frac{u - \sqrt{u^2 - 4\gamma\Phi}}{2\gamma}, \quad (\text{S9})$$

549 which becomes  $v = \Phi/u$  for  $\gamma \rightarrow 0$ , consistent with Eq. (S8). Substitution of Eq. (S9) into  
550 Eq. (S6) gives

$$\Phi = \left( \frac{u - \sqrt{u^2 - 4\gamma\Phi}}{2} \right)^2, \quad (\text{S10})$$

551 which can be shown in a standard calculation to be equivalent to

$$\Phi = \frac{u^2}{(1 + \gamma)^2} \quad (\text{S11})$$

552 for  $u > 0$  and  $-1 < \gamma < 1$ . Finally, substituting Eq. (S7) into Eq. (S11) gives

$$S^* = \frac{\left(1 - E[A_{ij}]\right)^2}{(1 + \gamma)^2 \text{var}(A_{ij})}, \quad (\text{S12})$$

553 which is exactly the theoretical limit of structural instability in isolated LV communities [Eq. (18.3)  
554 of Ref. 31], thus demonstrating that UFP-MA phase boundary and the onset of structural in-  
555 stability perfectly coincide.

556 **Temporal patterns in community structure:** Fluctuations in local population biomasses  
557 as communities move between unstable equilibria in heteroclinic networks can span multiple  
558 orders of magnitude (red trajectories in Fig. S9A) and lead to significant temporal turnover in  
559 community composition (Fig. S9B). In contrast, the high-level properties of the assemblages  
560 remain largely unchanged. This is evident in the dampening of biomass fluctuations at meta-  
561 population and metacommunity scales via a spatial portfolio effect (blue and black trajectories  
562 in Fig. S9A), but also in the robustness of species biomass distribution (Fig. S9C) and range  
563 size distribution (Fig. S9D, range sizes computed as in Ref. (16)). In this case the mean relative  
564 biomass and range size are plotted irrespective of species identity (black lines) along with the  
565 mean  $\pm$  one standard deviation (grey lines), for direct comparison with Ref. (39). The relat-  
566 ively small standard deviations demonstrate a temporally robust distribution of metapopulation  
567 biomasses and spatial ranges, despite large fluctuations at the local scale.

568 **STAR in large metacommunity models:** We characterised the within assemblage STAR  
569 using a moving spatio-temporal window as described in the main text and comparing the res-  
570 ulting SAR and STR exponents. In Fig. S10 we show the nested SAR and STR for a single  
571 metacommunity of  $N = 256$ . The number of species detected for large spatial or temporal  
572 windows necessarily saturates in closed systems. We therefore defined the exponents of the



573 STAR, displayed in Fig. 4 of the main text, as the maximum slope of the SAR/STR on double  
574 logarithmic axes.



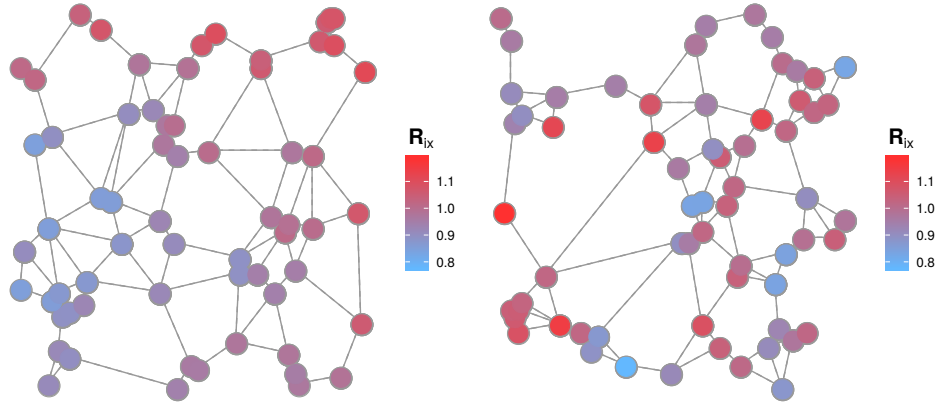

Figure S1: **Spatially autocorrelated growth rate distributions.** Intrinsic growth rates are sampled from spatially autocorrelated random fields of autocorrelation length  $\phi$  and variance  $\sigma^2$ . Two example distributions are shown, both of  $N = 64$ ,  $\sigma^2 = 0.01$ , with  $\phi = 10$  (left) and  $\phi = 1$  (right). See Materials and Methods for details.

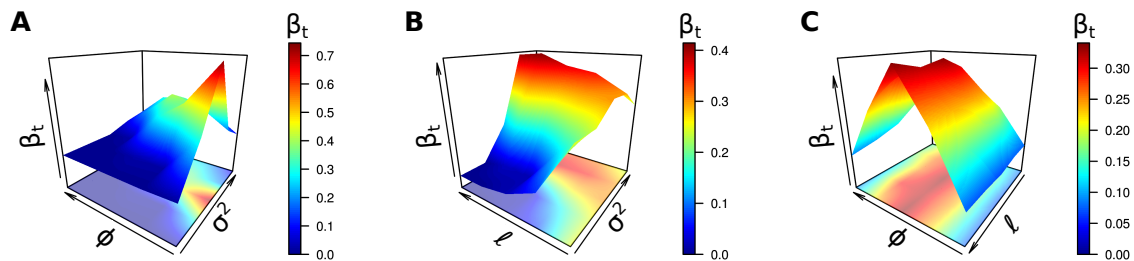

Figure S2: **Temporal turnover throughout the spatial parameter space.** Temporal  $\beta$ -diversity  $\beta_t$  was computed as the mean BC dissimilarity between time points in a time series of 1000 unit times, observed in metacommunities of  $N = 64$  patches. Correlation length  $\phi$  was varied in the range 1 to 100, environmental variability  $\sigma^2$  and dispersal length  $\ell$  in the range  $10^{-2}$  to 1, with each parameter combination replicated 10 times. The values of  $\phi$ ,  $\sigma^2$  and  $\ell$  were each plotted on logarithmic axes. In **A** we fixed  $\ell$  at 0.5; in **B**  $\phi$  at 10; and in **C**  $\sigma^2$  at 1.0. See Supplementary Text for details.

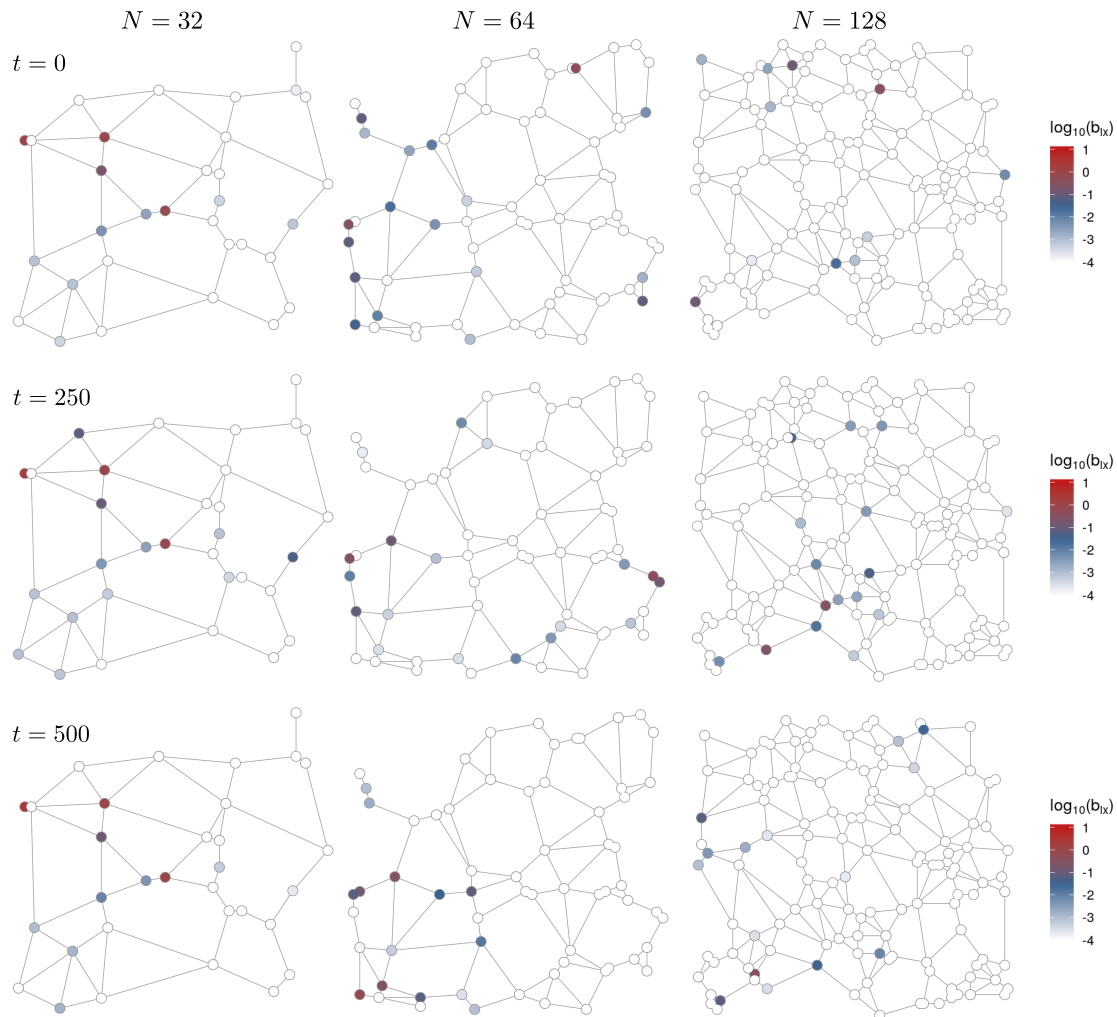

**Figure S3: Autonomous metapopulation dynamics in large metacommunity models.** In species rich metacommunities of  $N > 8$  patches, local biomasses autonomously fluctuate and the variability of those fluctuations increases with metacommunity size. Here we show the instantaneous biomass distributions for a single species in metacommunities of  $N = 32, 64$  and  $128$ , at three time points in logarithmic biomass units. For  $N = 32$ , autonomous fluctuations are largely restricted to the outer extremes of the species' distribution, while the core range (left of network) remains largely static. For  $N = 64$ , some nodes or regions may be permanently occupied by the focal species, however even in this core range biomass can fluctuate by orders of magnitude. With the emergence of Gleasonian turnover in the high  $N$  limit no or few nodes are permanently occupied and local community composition is no longer well characterized by the core-transient distinction (34,36,39), which decomposes local communities into populations that are present almost all the time, and those observed only rarely. Hence, for  $N = 128$  no obvious core range exists. Note that spatial networks are not shown to scale, the area of the model landscape is  $\approx N$  in all cases.  $A_{ij} = 0.5$  with probability 0.5,  $\phi = 10$ ,  $\sigma^2 = 0.01$ ,  $\ell = 0.5$ . See Main Text for details.

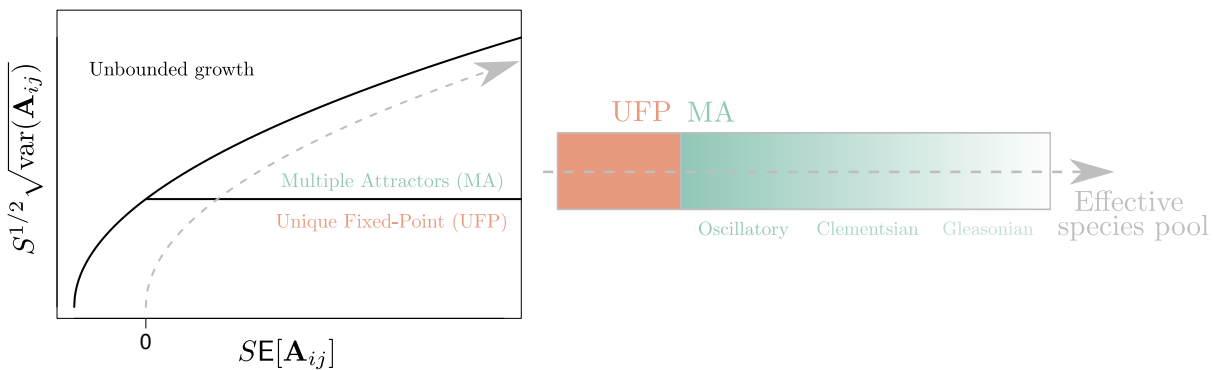

**Figure S4: The sharp transition between UFP and MA phases.** Reproduction of the phase diagram derived by Bunin (25) showing the emergence of MA as the size  $S$  of the species pool increases. In our case, the first and second moments of the distribution in  $A_{ij}$  were fixed. Community state in phase space therefore follows a square root function with increasing  $S$ , as indicated by the dashed line. (The “Unbounded growth” phase is hence not relevant for our study.) In spatially explicit metacommunity models we observe the emergence of autonomous turnover which transitions from oscillations to Clementsian and finally Gleasonian turnover. See Supplementary Text for details.

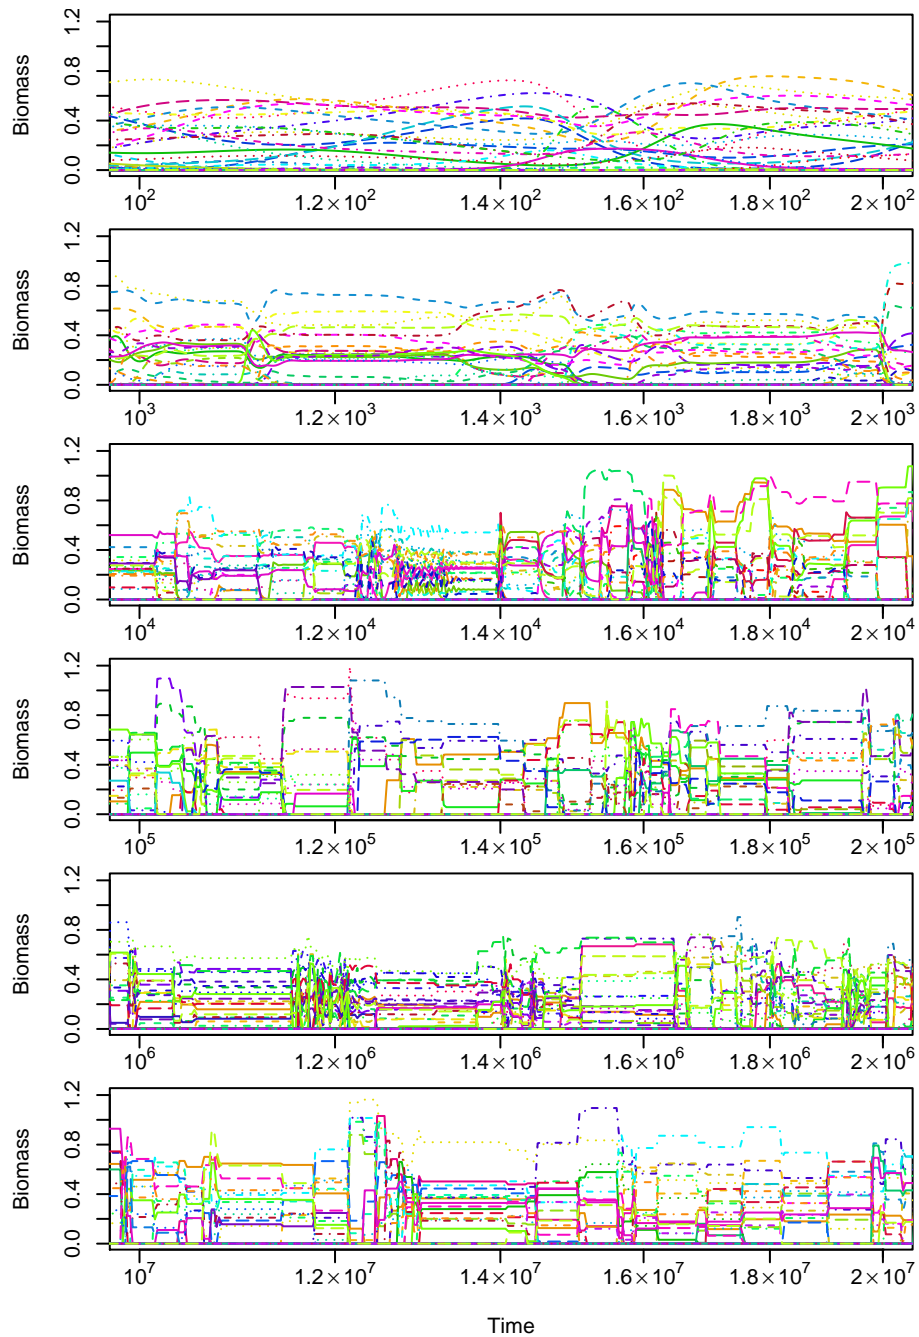

**Figure S5: Episodes in the approach of an isolated LV community model to a heteroclinic network.** The biomasses of different species are represented by lines of different colours and style. At any moment in time, all but a few of the  $S = 300$  species in the system have biomasses close to zero. With increasing simulation times  $t$  the intervals between the switches in system state, corresponding to transitions from the vicinity of one saddle point to the next, become longer, while the duration of these transitions remains of the order of magnitude of 10 time units, leading to increasingly sharper transitions on the logarithmic time scale. See Supplementary Text for details.

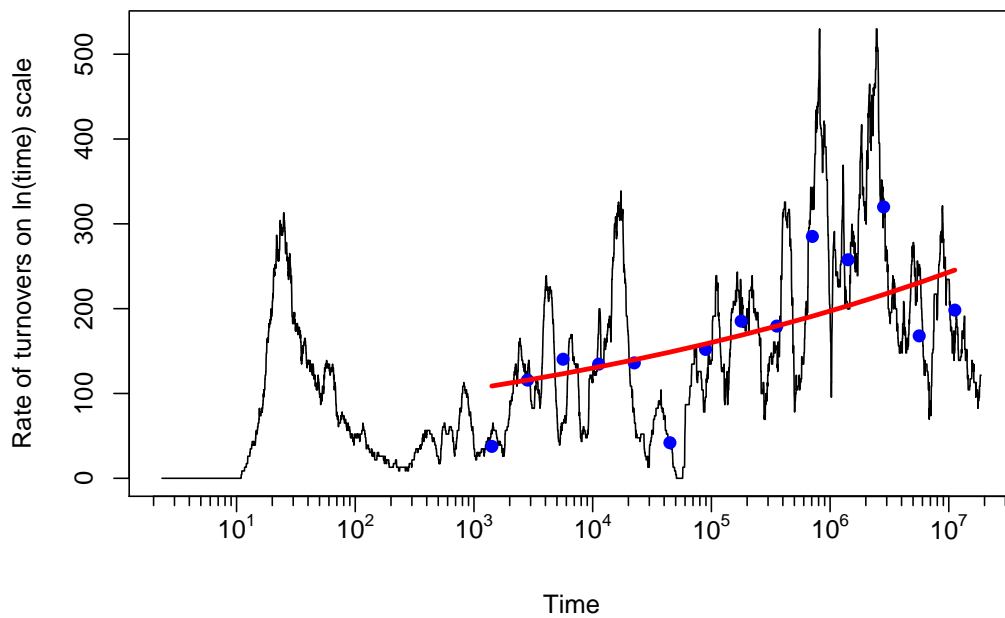

Figure S6: **Rate of change in community composition for the simulation shown in Fig. S5.** The black line is the moving average over 100 subsequent recordings, blue dots represent averages over non-overlapping adjacent blocks of 300 recordings for  $t \geq 1000$ , and the red line a median nonlinear regression of the dots by a power-law (rate)  $\sim t^\nu$  ( $\nu = 0.091 \pm 0.062$ , not significantly different from zero). See Supplementary Text for details.

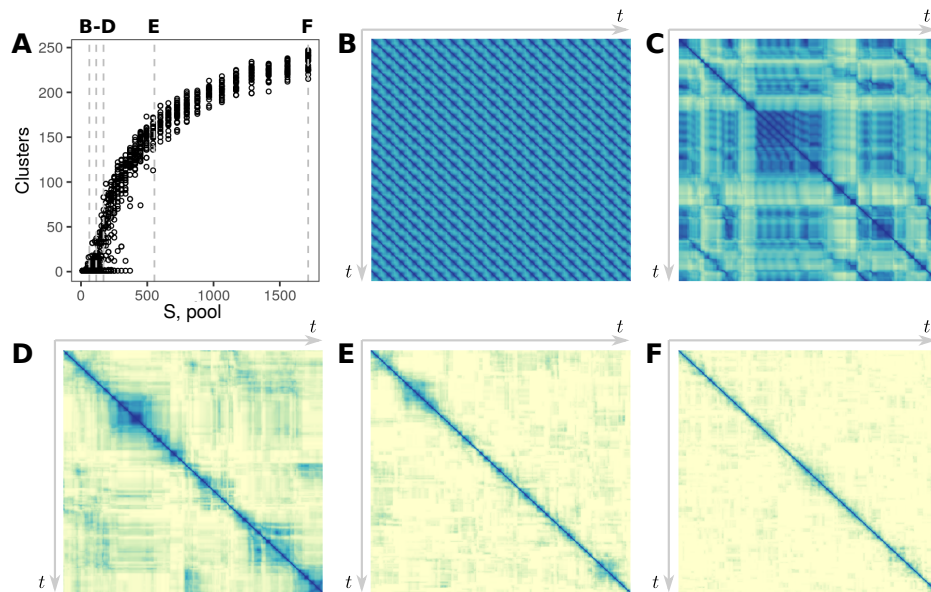

**Figure S7: Autonomous turnover in isolated LV communities.** **A:** The number of compositional clusters detected as a function of the size of the pool of potential invaders for a propagule pressure,  $\epsilon$ , of  $10^{-15}$  biomass units per unit time. **B-F:** Heatmaps of the pairwise Bray-Curtis similarity for the corresponding time-series (over  $10^4$  unit times) showing a clear transition from oscillatory to Clementsian turnover and finally to Gleasonian turnover. Dashed lines in **A** show the size of the species pool for which each community time series was generated.  $A_{ij} = 0.5$  with probability 0.5,  $\sigma^2 = 0.01$ . The parameters  $\phi$  and  $\ell$  are not defined for the isolated LV models. See Supplementary Text for details.



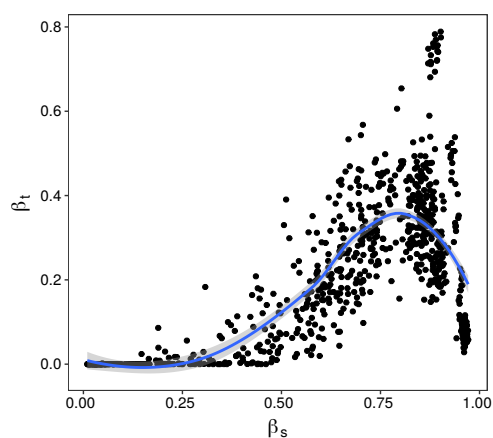

Figure S8: **Unimodal relationship between spatial and temporal turnover.** Spatially averaged temporal turnover plotted against the time averaged spatial turnover in the local neighbourhood, computed during 1000 unit times. Blue line and shaded area represent a locally weighted regression (LOESS smoothing) and 95% C.I.. Parameters  $N$ ,  $\phi$ ,  $\sigma^2$  and  $\ell$  as in Fig. S2. See Supplementary Text for details.

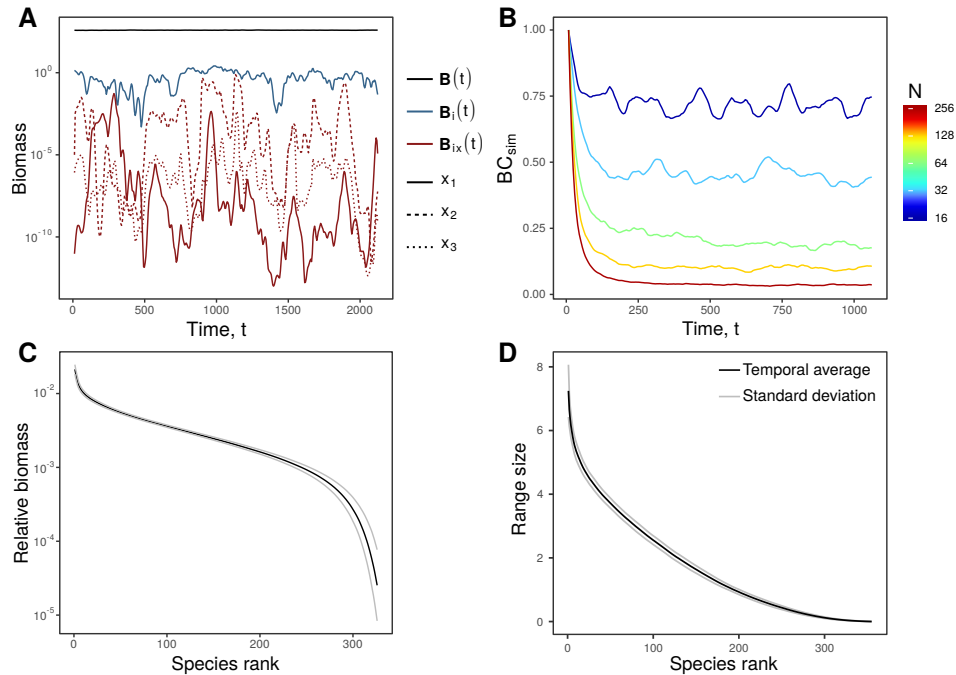

**Figure S9: Temporally robust community structure** **A:** We highlight the scale dependence of autonomous population dynamics by showing the biomass of three random local populations of the same species ( $B_{ix}$ , red), of the metapopulation of which they form a part ( $B_i = \sum_x B_{ix}$ , blue) and finally of the entire metacommunity ( $B = \sum_i \sum_x B_{ix}$ ), black). **B:** Autonomous turnover can be substantial. Here we show the decay of spatially averaged BC similarity from an arbitrary initial composition in metacommunities of  $N = 16, 32, 64, 128,$  and  $256$  patches. For large metacommunities undergoing autonomous Gleasonian turnover, the percentage of permanent populations, and hence the temporal BC similarity can drop to zero. **C:** Metacommunity scale relative rank abundance curve, plotted with species ‘identity’ disregarded. The black curve represents the mean biomass observed at a given rank, while grey curves represent the mean  $\pm$  one standard deviation. This figure highlights the temporally invariant diversity structure at the metacommunity scale. **D:** The temporally averaged rank range size curve, plotted as in C.  $A_{ij} = 0.5$  with probability 0.5,  $\phi = 10$ ,  $\sigma^2 = 0.01$ ,  $\ell = 0.5$ .  $N = 64$  for **A**, **C** and **D**. See Supplementary Text for details.

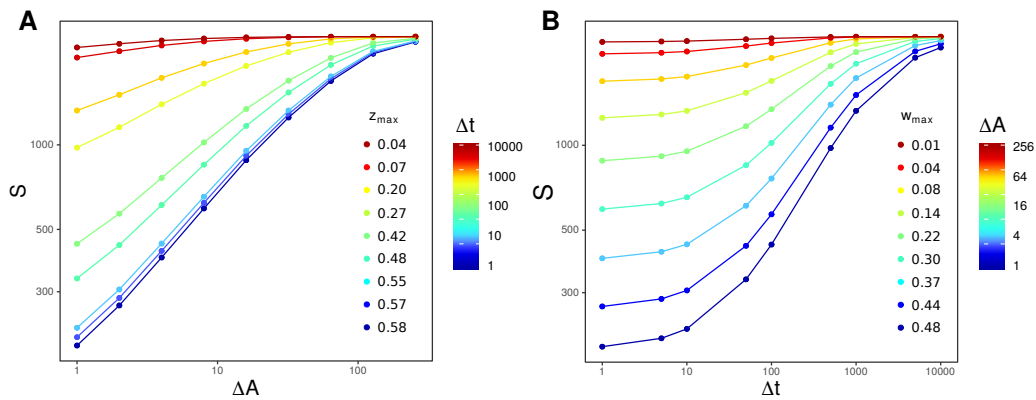

**Figure S10: The Species-Time-Area-Relation.** The nested SAR (A) and STR (B) generated using a sliding window approach for a single metacommunity model of  $N = 256$ . Metacommunity models are closed systems and as such, both the SAR and STR saturate for the large sub-samples. As such we defined the exponents of the STAR by the maximum slopes observed on double logarithmic axes.  $A_{ij} = 0.5$  with probability 0.5,  $\phi = 10$ ,  $\sigma^2 = 0.01$ ,  $\ell = 0.5$ . See Supplementary Text for details.
